# Supplementary material
Source: PubMed Central journal article supplement (PMC8090941)
Supplement: IAI.00531-20-s0001.pdf [file IAI.00531-20-s0001.pdf]

**Supplemental Table 1: Significant proteins in the CSF at day 1 post-infection by differential expression analysis**

| Accession | Protein                                                                | Sterile mean (log2) | Infected mean (log2) | Fold change (log2) | p value  |
|-----------|------------------------------------------------------------------------|---------------------|----------------------|--------------------|----------|
| P60711    | Actin, cytoplasmic 1                                                   | 0.00E+00            | 2.58E+00             | 2.58E+00           | 3.48E-02 |
| P62986    | Ubiquitin-60S ribosomal protein L40                                    | 0.00E+00            | 2.18E+00             | 2.18E+00           | 6.39E-05 |
| P62982    | Ubiquitin-40S ribosomal protein S27a                                   | 0.00E+00            | 2.14E+00             | 2.14E+00           | 6.39E-05 |
| P23562    | Band 3 anion transport protein                                         | 2.56E+00            | 4.52E+00             | 1.96E+00           | 1.47E-02 |
| P11442    | Clathrin heavy chain 1                                                 | 1.35E+00            | 3.19E+00             | 1.83E+00           | 2.52E-02 |
| Q62812    | Myosin-9                                                               | 1.19E+00            | 2.92E+00             | 1.74E+00           | 2.93E-02 |
| P27139    | Carbonic anhydrase 2                                                   | 9.55E-01            | 2.65E+00             | 1.70E+00           | 2.38E-02 |
| P46462    | Transitional endoplasmic reticulum ATPase                              | 1.98E+00            | 3.66E+00             | 1.67E+00           | 1.72E-02 |
| P04762    | Catalase                                                               | 2.26E+00            | 3.93E+00             | 1.67E+00           | 3.42E-02 |
| P35704    | Peroxiredoxin-2                                                        | 1.93E+00            | 3.54E+00             | 1.61E+00           | 9.08E-03 |
| Q5U300    | Ubiquitin-like modifier-activating enzyme 1                            | 1.11E+00            | 2.70E+00             | 1.58E+00           | 4.23E-02 |
| Q00728    | Histone H2A type 4                                                     | 0.00E+00            | 1.51E+00             | 1.51E+00           | 6.34E-05 |
| O35567    | Bifunctional purine biosynthesis protein ATIC                          | 1.09E+00            | 2.51E+00             | 1.42E+00           | 3.62E-02 |
| Q6AYZ1    | Tubulin alpha-1C chain                                                 | 0.00E+00            | 1.40E+00             | 1.40E+00           | 2.31E-04 |
| P47967    | Galectin-5                                                             | 8.71E-01            | 2.18E+00             | 1.31E+00           | 4.50E-02 |
| Q63716    | Peroxiredoxin-1                                                        | 9.76E-01            | 2.25E+00             | 1.27E+00           | 2.50E-02 |
| P01946    | Hemoglobin subunit alpha-1/2                                           | 5.75E+00            | 6.88E+00             | 1.12E+00           | 2.08E-02 |
| P04797    | Glyceraldehyde-3-phosphate dehydrogenase                               | 2.43E+00            | 3.52E+00             | 1.09E+00           | 3.73E-02 |
| P11232    | Thioredoxin                                                            | 2.27E-01            | 1.30E+00             | 1.07E+00           | 4.56E-03 |
| P02091    | Hemoglobin subunit beta-1                                              | 6.42E+00            | 7.39E+00             | 9.69E-01           | 4.83E-02 |
| P14942    | Glutathione S-transferase alpha-4                                      | 8.35E-02            | 1.02E+00             | 9.36E-01           | 2.92E-02 |
| Q9JLT0    | Myosin-10                                                              | 0.00E+00            | 7.84E-01             | 7.84E-01           | 1.49E-02 |
| P19468    | Glutamate--cysteine ligase catalytic subunit                           | 4.82E-01            | 1.21E+00             | 7.33E-01           | 2.93E-02 |
| P29975    | Aquaporin-1                                                            | 0.00E+00            | 6.05E-01             | 6.05E-01           | 1.49E-02 |
| Q63041    | Alpha-1-macroglobulin                                                  | 6.29E+00            | 6.86E+00             | 5.74E-01           | 4.06E-02 |
| Q07936    | Annexin A2                                                             | 0.00E+00            | 5.26E-01             | 5.26E-01           | 5.97E-03 |
| P35859    | Insulin-like growth factor-binding protein complex acid labile subunit | 0.00E+00            | 3.98E-01             | 3.98E-01           | 1.49E-02 |
| P18422    | Proteasome subunit alpha type-3                                        | 4.72E-02            | 4.27E-01             | 3.79E-01           | 4.50E-02 |
| Q63691    | Monocyte differentiation antigen CD14                                  | 0.00E+00            | 3.43E-01             | 3.43E-01           | 3.50E-02 |
| P27867    | Sorbitol dehydrogenase                                                 | 7.77E-02            | 3.70E-01             | 2.92E-01           | 4.33E-02 |
| P47942    | Dihydropyrimidinase-related protein 2                                  | 0.00E+00            | 2.49E-01             | 2.49E-01           | 1.49E-02 |
| P20767    | Ig lambda-2 chain C region                                             | 0.00E+00            | 2.18E-01             | 2.18E-01           | 1.49E-02 |
| Q68FR6    | Elongation factor 1-gamma                                              | 0.00E+00            | 1.93E-01             | 1.93E-01           | 3.50E-02 |
| P07943    | Aldo-keto reductase family 1 member B1                                 | 0.00E+00            | 1.67E-01             | 1.67E-01           | 1.49E-02 |

|        |                                                                            |          |          |           |          |
|--------|----------------------------------------------------------------------------|----------|----------|-----------|----------|
| D4A1R8 | Copine-1                                                                   | 0.00E+00 | 1.64E-01 | 1.64E-01  | 3.50E-02 |
| Q5HZE4 | Methylthioribose-1-phosphate isomerase                                     | 0.00E+00 | 1.10E-01 | 1.10E-01  | 3.50E-02 |
| Q6P6T4 | Echinoderm microtubule-associated protein-like 2                           | 0.00E+00 | 8.87E-02 | 8.87E-02  | 3.50E-02 |
| Q62867 | Gamma-glutamyl hydrolase                                                   | 2.07E-01 | 0.00E+00 | -2.07E-01 | 3.50E-02 |
| Q5XII0 | Mammalian ependymin-related protein 1                                      | 3.34E-01 | 0.00E+00 | -3.34E-01 | 3.48E-02 |
| P29534 | Vascular cell adhesion protein 1                                           | 3.63E-01 | 0.00E+00 | -3.63E-01 | 3.50E-02 |
| Q63772 | Growth arrest-specific protein 6                                           | 3.72E-01 | 0.00E+00 | -3.72E-01 | 3.48E-02 |
| Q00657 | Chondroitin sulfate proteoglycan 4                                         | 3.77E-01 | 0.00E+00 | -3.77E-01 | 1.49E-02 |
| P50430 | Arylsulfatase B                                                            | 3.82E-01 | 0.00E+00 | -3.82E-01 | 1.49E-02 |
| Q1WIM3 | Cell adhesion molecule 3                                                   | 4.15E-01 | 0.00E+00 | -4.15E-01 | 1.49E-02 |
| Q5U367 | Multifunctional procollagen lysine hydroxylase and glycosyltransferase LH3 | 4.15E-01 | 0.00E+00 | -4.15E-01 | 3.50E-02 |
| Q8R553 | Calsyntenin-3                                                              | 4.18E-01 | 0.00E+00 | -4.18E-01 | 1.49E-02 |
| P20156 | Neurosecretory protein VGF                                                 | 4.49E-01 | 0.00E+00 | -4.49E-01 | 1.49E-02 |
| P01346 | Insulin-like growth factor II                                              | 4.54E-01 | 0.00E+00 | -4.54E-01 | 3.50E-02 |
| D3ZHP7 | Serine/threonine-protein kinase ULK3                                       | 4.56E-01 | 0.00E+00 | -4.56E-01 | 2.20E-03 |
| P47853 | Biglycan                                                                   | 4.69E-01 | 0.00E+00 | -4.69E-01 | 3.50E-02 |
| Q62935 | von Willebrand factor                                                      | 4.80E-01 | 0.00E+00 | -4.80E-01 | 3.50E-02 |
| O54861 | Sortilin                                                                   | 5.10E-01 | 0.00E+00 | -5.10E-01 | 3.50E-02 |
| P08460 | Nidogen-1                                                                  | 5.56E-01 | 0.00E+00 | -5.56E-01 | 1.49E-02 |
| Q8K4Y7 | Soluble calcium-activated nucleotidase 1                                   | 5.91E-01 | 0.00E+00 | -5.91E-01 | 3.50E-02 |
| Q08420 | Extracellular superoxide dismutase [Cu-Zn]                                 | 5.98E-01 | 0.00E+00 | -5.98E-01 | 2.20E-03 |
| Q91XT9 | Neutral ceramidase                                                         | 5.99E-01 | 0.00E+00 | -5.99E-01 | 5.97E-03 |
| D3ZTE0 | Coagulation factor XII                                                     | 6.09E-01 | 0.00E+00 | -6.09E-01 | 2.20E-03 |
| P18424 | Phosphatidylcholine-sterol acyltransferase                                 | 6.27E-01 | 0.00E+00 | -6.27E-01 | 5.94E-03 |
| P0CC10 | Leucine-rich repeat-containing protein 4B                                  | 6.48E-01 | 0.00E+00 | -6.48E-01 | 1.49E-02 |
| P35952 | Low-density lipoprotein receptor                                           | 6.56E-01 | 0.00E+00 | -6.56E-01 | 1.49E-02 |
| P12346 | Serotransferrin                                                            | 8.19E+00 | 7.53E+00 | -6.57E-01 | 3.68E-04 |
| Q64319 | Neutral and basic amino acid transport protein rBAT                        | 6.66E-01 | 0.00E+00 | -6.66E-01 | 7.47E-04 |
| P35446 | Spondin-1                                                                  | 6.74E-01 | 0.00E+00 | -6.74E-01 | 2.20E-03 |
| Q1WIM1 | Cell adhesion molecule 4                                                   | 7.65E-01 | 0.00E+00 | -7.65E-01 | 1.49E-02 |
| P50609 | Fibromodulin                                                               | 7.65E-01 | 0.00E+00 | -7.65E-01 | 5.97E-03 |
| Q9R0D6 | Transcobalamin-2                                                           | 1.42E+00 | 6.54E-01 | -7.69E-01 | 3.96E-02 |
| Q9JKS6 | Protein piccolo                                                            | 7.75E-01 | 0.00E+00 | -7.75E-01 | 2.21E-03 |
| Q6AYE5 | Out at first protein homolog                                               | 7.90E-01 | 0.00E+00 | -7.90E-01 | 5.97E-03 |
| P15473 | Insulin-like growth factor-binding protein 3                               | 8.00E-01 | 0.00E+00 | -8.00E-01 | 5.94E-03 |
| Q6P9V9 | Tubulin alpha-1B chain                                                     | 8.35E-01 | 0.00E+00 | -8.35E-01 | 2.21E-03 |
| P02563 | Myosin-6                                                                   | 8.84E-01 | 0.00E+00 | -8.84E-01 | 3.50E-02 |
| P02650 | Apolipoprotein E                                                           | 6.66E+00 | 5.76E+00 | -8.99E-01 | 3.75E-02 |

|        |                                                         |          |          |           |          |
|--------|---------------------------------------------------------|----------|----------|-----------|----------|
| Q9R1T3 | Cathepsin Z                                             | 9.47E-01 | 0.00E+00 | -9.47E-01 | 2.30E-04 |
| P62632 | Elongation factor 1-alpha 2                             | 9.71E-01 | 0.00E+00 | -9.71E-01 | 1.49E-02 |
| Q63374 | Neurexin-2                                              | 1.35E+00 | 3.53E-01 | -1.00E+00 | 2.29E-02 |
| Q5ZQU0 | Sushi, nidogen and EGF-like domain-containing protein 1 | 1.01E+00 | 0.00E+00 | -1.01E+00 | 2.21E-03 |
| O35112 | CD166 antigen                                           | 1.04E+00 | 0.00E+00 | -1.04E+00 | 2.21E-03 |
| Q8CHN8 | Mannan-binding lectin serine protease 1                 | 1.39E+00 | 2.84E-01 | -1.10E+00 | 2.76E-02 |
| P0C0S7 | Histone H2A.Z                                           | 1.11E+00 | 0.00E+00 | -1.11E+00 | 6.34E-05 |
| O35217 | Multiple inositol polyphosphate phosphatase 1           | 1.17E+00 | 0.00E+00 | -1.17E+00 | 5.97E-03 |
| Q9JLD2 | Neuroserpin                                             | 1.57E+00 | 3.84E-01 | -1.19E+00 | 3.57E-02 |
| Q62718 | Neurotrimin                                             | 1.19E+00 | 0.00E+00 | -1.19E+00 | 5.97E-03 |
| Q6IRK9 | Carboxypeptidase Q                                      | 2.44E+00 | 1.23E+00 | -1.21E+00 | 3.55E-02 |
| P13941 | Collagen alpha-1(III) chain                             | 1.30E+00 | 0.00E+00 | -1.30E+00 | 5.97E-03 |
| Q6IG01 | Keratin, type II cytoskeletal 1b                        | 2.23E+00 | 0.00E+00 | -2.23E+00 | 2.31E-04 |
| P68035 | Actin, alpha cardiac muscle 1                           | 4.55E+00 | 0.00E+00 | -4.55E+00 | 6.39E-05 |

**Supplemental Table 2: Significant proteins in the CSF at day 5 post-infection by differential expression analysis**

| Accession | Protein                                    | Sterile mean (log2) | Infected mean (log2) | Fold change (log2) | p value  |
|-----------|--------------------------------------------|---------------------|----------------------|--------------------|----------|
| P62630    | Elongation factor 1-alpha 1                | 0.00E+00            | 1.68E+00             | 1.68E+00           | 9.29E-05 |
| P62632    | Elongation factor 1-alpha 2                | 0.00E+00            | 1.68E+00             | 1.68E+00           | 9.29E-05 |
| Q4G091    | MICAL C-terminal-like protein              | 0.00E+00            | 1.33E+00             | 1.33E+00           | 3.00E-05 |
| P00507    | Aspartate aminotransferase, mitochondrial  | 0.00E+00            | 9.28E-01             | 9.28E-01           | 3.97E-03 |
| Q63621    | Interleukin-1 receptor accessory protein   | 0.00E+00            | 9.15E-01             | 9.15E-01           | 2.65E-04 |
| P0CC10    | Leucine-rich repeat-containing protein 4B  | 0.00E+00            | 8.87E-01             | 8.87E-01           | 3.97E-03 |
| Q6P9V9    | Tubulin alpha-1B chain                     | 0.00E+00            | 8.61E-01             | 8.61E-01           | 3.53E-02 |
| P18418    | Calreticulin                               | 3.51E-01            | 1.14E+00             | 7.85E-01           | 1.65E-02 |
| P00697    | Lysozyme C-1                               | 0.00E+00            | 7.33E-01             | 7.33E-01           | 1.79E-02 |
| P24268    | Cathepsin D                                | 0.00E+00            | 6.79E-01             | 6.79E-01           | 3.97E-03 |
| Q811M5    | Complement component C6                    | 4.37E-01            | 1.11E+00             | 6.71E-01           | 3.13E-02 |
| P18424    | Phosphatidylcholine-sterol acyltransferase | 0.00E+00            | 6.65E-01             | 6.65E-01           | 8.65E-03 |

|        |                                                          |          |          |           |          |
|--------|----------------------------------------------------------|----------|----------|-----------|----------|
| P30427 | Plectin                                                  | 0.00E+00 | 5.63E-01 | 5.63E-01  | 3.53E-02 |
| P15865 | Histone H1.4                                             | 0.00E+00 | 5.33E-01 | 5.33E-01  | 1.79E-02 |
| Q63772 | Growth arrest-specific protein 6                         | 0.00E+00 | 5.10E-01 | 5.10E-01  | 1.79E-02 |
| Q9Z1P2 | Alpha-actinin-1                                          | 0.00E+00 | 4.98E-01 | 4.98E-01  | 8.65E-03 |
| O08619 | Coagulation factor XIII A chain                          | 0.00E+00 | 4.85E-01 | 4.85E-01  | 3.53E-02 |
| Q64604 | Receptor-type tyrosine-protein phosphatase F             | 0.00E+00 | 4.78E-01 | 4.78E-01  | 1.79E-02 |
| D3ZHA0 | Filamin-C                                                | 0.00E+00 | 4.65E-01 | 4.65E-01  | 3.53E-02 |
| P09330 | Ribose-phosphate pyrophosphokinase 2                     | 0.00E+00 | 4.59E-01 | 4.59E-01  | 3.53E-02 |
| P47942 | Dihydropyrimidinase-related protein 2                    | 0.00E+00 | 3.92E-01 | 3.92E-01  | 3.53E-02 |
| Q8K586 | GTP-binding nuclear protein Ran, testis-specific isoform | 2.16E-01 | 0.00E+00 | -2.16E-01 | 4.42E-02 |
| P07943 | Aldo-keto reductase family 1 member B1                   | 2.59E-01 | 0.00E+00 | -2.59E-01 | 4.42E-02 |
| O88277 | Protocadherin Fat 2                                      | 2.92E-01 | 0.00E+00 | -2.92E-01 | 4.42E-02 |
| P42346 | Serine/threonine-protein kinase mTOR                     | 3.05E-01 | 0.00E+00 | -3.05E-01 | 4.42E-02 |
| Q4QRB4 | Tubulin beta-3 chain                                     | 3.11E-01 | 0.00E+00 | -3.11E-01 | 4.40E-02 |
| Q6QLM7 | Kinesin heavy chain isoform 5A                           | 3.45E-01 | 0.00E+00 | -3.45E-01 | 4.40E-02 |
| Q9JKU3 | Intraflagellar transport protein 172 homolog             | 3.96E-01 | 0.00E+00 | -3.96E-01 | 4.42E-02 |
| P60892 | Ribose-phosphate pyrophosphokinase 1                     | 4.23E-01 | 0.00E+00 | -4.23E-01 | 4.42E-02 |
| P68370 | Tubulin alpha-1A chain                                   | 4.76E-01 | 0.00E+00 | -4.76E-01 | 1.67E-02 |
| P16086 | Spectrin alpha chain, non-erythrocytic 1                 | 4.91E-01 | 0.00E+00 | -4.91E-01 | 1.67E-02 |
| P04916 | Retinol-binding protein 4                                | 5.34E-01 | 0.00E+00 | -5.34E-01 | 1.67E-02 |
| Q08877 | Dynamin-3                                                | 5.41E-01 | 0.00E+00 | -5.41E-01 | 1.67E-02 |
| P39052 | Dynamin-2                                                | 6.56E-01 | 0.00E+00 | -6.56E-01 | 1.67E-02 |
| P20156 | Neurosecretory protein VGF                               | 6.66E-01 | 0.00E+00 | -6.66E-01 | 5.98E-03 |
| Q5PQQ8 | Integrin beta-like protein 1                             | 7.23E-01 | 0.00E+00 | -7.23E-01 | 2.00E-03 |
| P15473 | Insulin-like growth factor-binding protein 3             | 7.54E-01 | 0.00E+00 | -7.54E-01 | 5.98E-03 |
| P60711 | Actin, cytoplasmic 1                                     | 4.86E+00 | 4.06E+00 | -8.03E-01 | 1.09E-02 |
| P25236 | Selenoprotein P                                          | 8.39E-01 | 0.00E+00 | -8.39E-01 | 6.15E-04 |
| P68136 | Actin, alpha skeletal muscle                             | 4.63E+00 | 3.17E+00 | -1.46E+00 | 7.58E-03 |

**Supplemental Table 3: Significant proteins in the CSF at day 28 post-infection by differential expression analysis**

| Accession | Protein                             | Sterile mean (log <sub>2</sub> ) | Infected mean (log <sub>2</sub> ) | Fold change (log <sub>2</sub> ) | p value  |
|-----------|-------------------------------------|----------------------------------|-----------------------------------|---------------------------------|----------|
| P63269    | Actin, gamma-enteric smooth muscle  | 0.00E+00                         | 2.43E+00                          | 2.43E+00                        | 2.05E-02 |
| P97524    | Very long-chain acyl-CoA synthetase | 0.00E+00                         | 2.22E+00                          | 2.22E+00                        | 1.25E-03 |
| P09117    | Fructose-bisphosphate aldolase C    | 0.00E+00                         | 2.15E+00                          | 2.15E+00                        | 1.25E-03 |

|        |                                                             |          |          |          |          |
|--------|-------------------------------------------------------------|----------|----------|----------|----------|
| P14659 | Heat shock-related 70 kDa protein 2                         | 0.00E+00 | 2.02E+00 | 2.02E+00 | 3.45E-03 |
| Q9JIS1 | Regulating synaptic membrane exocytosis protein 2           | 0.00E+00 | 1.91E+00 | 1.91E+00 | 1.25E-03 |
| P62982 | Ubiquitin-40S ribosomal protein S27a                        | 0.00E+00 | 1.71E+00 | 1.71E+00 | 1.25E-03 |
| P16086 | Spectrin alpha chain, non-erythrocytic 1                    | 0.00E+00 | 1.60E+00 | 1.60E+00 | 3.45E-03 |
| P07323 | Gamma-enolase                                               | 7.41E-01 | 2.16E+00 | 1.42E+00 | 3.76E-02 |
| P06685 | Sodium/potassium-transporting ATPase subunit alpha-1        | 0.00E+00 | 1.41E+00 | 1.41E+00 | 4.52E-02 |
| Q6AYZ1 | Tubulin alpha-1C chain                                      | 0.00E+00 | 1.32E+00 | 1.32E+00 | 3.45E-03 |
| B0LPN4 | Ryanodine receptor 2                                        | 0.00E+00 | 1.27E+00 | 1.27E+00 | 8.73E-03 |
| P16617 | Phosphoglycerate kinase 1                                   | 0.00E+00 | 1.25E+00 | 1.25E+00 | 3.45E-03 |
| P11517 | Hemoglobin subunit beta-2                                   | 3.61E+00 | 4.77E+00 | 1.16E+00 | 4.35E-02 |
| P54282 | Voltage-dependent P/Q-type calcium channel subunit alpha-1A | 0.00E+00 | 1.16E+00 | 1.16E+00 | 4.52E-02 |
| Q9JKS6 | Protein piccolo                                             | 0.00E+00 | 1.13E+00 | 1.13E+00 | 1.25E-03 |
| P21575 | Dynamin-1                                                   | 0.00E+00 | 1.11E+00 | 1.11E+00 | 2.05E-02 |
| Q7TMA5 | Apolipoprotein B-100                                        | 0.00E+00 | 1.05E+00 | 1.05E+00 | 2.05E-02 |
| Q63475 | Receptor-type tyrosine-protein phosphatase N2               | 0.00E+00 | 1.03E+00 | 1.03E+00 | 2.05E-02 |
| P55314 | Complement component C8 beta chain                          | 0.00E+00 | 9.65E-01 | 9.65E-01 | 8.73E-03 |
| P48199 | C-reactive protein                                          | 0.00E+00 | 9.18E-01 | 9.18E-01 | 2.05E-02 |
| P15999 | ATP synthase subunit alpha, mitochondrial                   | 0.00E+00 | 8.55E-01 | 8.55E-01 | 4.52E-02 |
| P10719 | ATP synthase subunit beta, mitochondrial                    | 0.00E+00 | 8.34E-01 | 8.34E-01 | 4.52E-02 |
| P00507 | Aspartate aminotransferase, mitochondrial                   | 0.00E+00 | 7.95E-01 | 7.95E-01 | 2.05E-02 |
| Q8CG09 | Multidrug resistance-associated protein 1                   | 0.00E+00 | 7.83E-01 | 7.83E-01 | 8.73E-03 |
| Q05764 | Beta-adducin                                                | 0.00E+00 | 7.61E-01 | 7.61E-01 | 2.05E-02 |
| P16638 | ATP-citrate synthase                                        | 0.00E+00 | 7.39E-01 | 7.39E-01 | 2.05E-02 |
| P07335 | Creatine kinase B-type                                      | 0.00E+00 | 6.32E-01 | 6.32E-01 | 4.52E-02 |
| Q64604 | Receptor-type tyrosine-protein phosphatase F                | 0.00E+00 | 5.88E-01 | 5.88E-01 | 2.05E-02 |
| P07154 | Cathepsin L1                                                | 0.00E+00 | 5.86E-01 | 5.86E-01 | 4.52E-02 |
| Q66H86 | Olfactomedin-like protein 1                                 | 0.00E+00 | 5.61E-01 | 5.61E-01 | 2.04E-02 |
| Q9QWN8 | Spectrin beta chain, non-erythrocytic 2                     | 0.00E+00 | 5.47E-01 | 5.47E-01 | 4.52E-02 |
| P09330 | Ribose-phosphate pyrophosphokinase 2                        | 0.00E+00 | 5.23E-01 | 5.23E-01 | 2.05E-02 |
| Q8R491 | EH domain-containing protein 3                              | 0.00E+00 | 5.12E-01 | 5.12E-01 | 4.52E-02 |
| Q5PQQ8 | Integrin beta-like protein 1                                | 0.00E+00 | 4.67E-01 | 4.67E-01 | 4.52E-02 |
| Q9WTV1 | Chitinase-3-like protein 1                                  | 0.00E+00 | 4.44E-01 | 4.44E-01 | 4.52E-02 |
| P30427 | Plectin                                                     | 0.00E+00 | 4.28E-01 | 4.28E-01 | 2.04E-02 |
| P48679 | Prelamin-A/C                                                | 0.00E+00 | 3.83E-01 | 3.83E-01 | 4.52E-02 |
| A0JPJ7 | Obg-like ATPase 1                                           | 0.00E+00 | 3.51E-01 | 3.51E-01 | 4.52E-02 |
| Q5FVF9 | Biotinidase                                                 | 0.00E+00 | 3.45E-01 | 3.45E-01 | 4.52E-02 |
| P12711 | Alcohol dehydrogenase class-3                               | 0.00E+00 | 3.01E-01 | 3.01E-01 | 4.52E-02 |

|        |                                                                            |          |          |           |          |
|--------|----------------------------------------------------------------------------|----------|----------|-----------|----------|
| P19356 | Porphobilinogen deaminase                                                  | 0.00E+00 | 2.91E-01 | 2.91E-01  | 4.50E-02 |
| P35859 | Insulin-like growth factor-binding protein complex acid labile subunit     | 0.00E+00 | 2.87E-01 | 2.87E-01  | 4.52E-02 |
| O55096 | Dipeptidyl peptidase 3                                                     | 0.00E+00 | 2.87E-01 | 2.87E-01  | 4.52E-02 |
| Q63347 | 26S proteasome regulatory subunit 7                                        | 0.00E+00 | 2.87E-01 | 2.87E-01  | 4.52E-02 |
| Q6P7A9 | Lysosomal alpha-glucosidase                                                | 5.59E-01 | 0.00E+00 | -5.59E-01 | 2.56E-02 |
| P0C0K7 | Ephrin type-B receptor 6                                                   | 6.40E-01 | 0.00E+00 | -6.40E-01 | 2.56E-02 |
| P04276 | Vitamin D-binding protein                                                  | 6.20E+00 | 5.54E+00 | -6.63E-01 | 2.74E-02 |
| Q5U367 | Multifunctional procollagen lysine hydroxylase and glycosyltransferase LH3 | 6.71E-01 | 0.00E+00 | -6.71E-01 | 2.56E-02 |
| P14562 | Lysosome-associated membrane glycoprotein 1                                | 7.11E-01 | 0.00E+00 | -7.11E-01 | 2.56E-02 |
| Q68FS4 | Cytosol aminopeptidase                                                     | 7.12E-01 | 0.00E+00 | -7.12E-01 | 2.56E-02 |
| Q925N6 | Immunoglobulin superfamily member 1                                        | 3.21E+00 | 2.49E+00 | -7.13E-01 | 2.46E-02 |
| P25304 | Agrin                                                                      | 7.20E-01 | 0.00E+00 | -7.20E-01 | 2.56E-02 |
| P49432 | Pyruvate dehydrogenase E1 component subunit beta, mitochondrial            | 7.90E-01 | 0.00E+00 | -7.90E-01 | 2.56E-02 |
| Q8K4Y7 | Soluble calcium-activated nucleotidase 1                                   | 8.44E-01 | 0.00E+00 | -8.44E-01 | 2.56E-02 |
| Q63132 | Proto-oncogene tyrosine-protein kinase ROS                                 | 8.60E-01 | 0.00E+00 | -8.60E-01 | 2.56E-02 |
| Q6P6T1 | Complement C1s subcomponent                                                | 2.03E+00 | 1.14E+00 | -8.94E-01 | 3.64E-02 |
| P10960 | Prosaposin                                                                 | 3.96E+00 | 2.98E+00 | -9.75E-01 | 3.72E-02 |
| A9UMV8 | Histone H2A.J                                                              | 1.08E+00 | 0.00E+00 | -1.08E+00 | 3.51E-03 |
| P02764 | Alpha-1-acid glycoprotein                                                  | 3.08E+00 | 1.98E+00 | -1.10E+00 | 4.53E-02 |
| P55067 | Neurocan core protein                                                      | 1.20E+00 | 0.00E+00 | -1.20E+00 | 3.51E-03 |
| P70490 | Lactadherin                                                                | 2.51E+00 | 1.24E+00 | -1.27E+00 | 6.80E-03 |
| O35568 | EGF-containing fibulin-like extracellular matrix protein 1                 | 3.50E+00 | 2.21E+00 | -1.29E+00 | 2.47E-02 |
| P47971 | Neuronal pentraxin-1                                                       | 1.31E+00 | 0.00E+00 | -1.31E+00 | 3.51E-03 |
| P15800 | Laminin subunit beta-2                                                     | 2.85E+00 | 1.52E+00 | -1.33E+00 | 1.60E-02 |
| D3ZTE0 | Coagulation factor XII                                                     | 2.33E+00 | 9.91E-01 | -1.34E+00 | 4.81E-03 |
| P62630 | Elongation factor 1-alpha 1                                                | 1.54E+00 | 0.00E+00 | -1.54E+00 | 3.51E-03 |
| P62632 | Elongation factor 1-alpha 2                                                | 1.56E+00 | 0.00E+00 | -1.56E+00 | 3.51E-03 |
| Q6TQE1 | Zinc finger CCCH domain-containing protein 18                              | 1.63E+00 | 0.00E+00 | -1.63E+00 | 1.14E-03 |
| Q9WU06 | Advillin                                                                   | 1.93E+00 | 0.00E+00 | -1.93E+00 | 3.51E-03 |
